# Supplementary material
Source: PubMed Central journal article supplement (PMC7065840)
Supplement: NIHMS1557600-supplement-1.pdf [file NIHMS1557600-supplement-1.pdf]

## SUPPLEMENTAL INFORMATION

**TABLE 1**

|               |                                                                                                                                                                                                                                                                                                   |
|---------------|---------------------------------------------------------------------------------------------------------------------------------------------------------------------------------------------------------------------------------------------------------------------------------------------------|
| $\Delta$ sarA | <i>Staphylococcus aureus</i> , <i>Streptococcus dysgalactiae</i> , <i>Pseudomonas aeruginosa</i> , <i>E. coli</i> , non-haemolytic rough, <i>Staphylococcus hyicus</i> ss <i>hyicus</i> , <i>Proteus vulgaris</i> , <i>Enterococcus faecalis</i> , <i>Lysinibacillus</i> sp., <i>Bacillus</i> sp. |
| USA 300       | <i>Staphylococcus aureus</i> , <i>Staphylococcus hyicus</i> ss <i>hyicus</i> , <i>Enterococcus faecalis</i> , <i>Klebsiella oxytoca</i> , <i>E. coli</i> , non-haemolytic rough, <i>Proteus vulgaris</i> , <i>Proteus mirabilis</i>                                                               |
| $\Delta$ rexB | <i>Staphylococcus aureus</i> , <i>Streptococcus dysgalactiae</i> , <i>Pseudomonas aeruginosa</i> , <i>Enterobacter cloacae</i> , <i>Klebsiella oxytoca</i> , <i>Staphylococcus hyicus</i> ss <i>chromogenes</i> , <i>Pseudomonas aeruginosa</i>                                                   |

## SUPPLEMENTAL METHODS

### Characterization of Polymicrobial Wound Infection

Characterization of polymicrobial wound infection was done as previously described with minor modifications<sup>1</sup>. The minced wound tissue samples were inoculated on TSA II (Becton Dickinson, NJ) with 5% sheep blood agar and on MacConkey agar (Becton Dickinson, NJ) and incubated at 37°C aerobically as well as on TSA II with 5% sheep blood agar with a nurse *Staphylococcus aureus* streak and Chocolate II (Becton Dickinson, NJ) with hemoglobin, IsoVitalax agar and incubated at 37°C in a 10% CO<sub>2</sub> incubator. Growth was checked daily for three days. Bacterial colonies were set on MALDI-TOF™ (Bruker, MA) for identification.

### Laser Capture Microdissection

Laser capture microdissection of the granulation tissue of the engineered human scaffolds was done as previously described<sup>2</sup>.

### Preparation of Human Engineered Skin

Human engineered skin were prepared as described previously<sup>3</sup>

## SUPPLEMENTAL FIGURE LEGENDS

**Figure S1:** Bacterial biofilm of  $\Delta sarA$ , USA300 &  $\Delta rexB$  were developed on polycarbonate membrane. **A**, Digital photographs of the biofilm by the mutants and wild type strains of bacteria on polycarbonate membrane discs (left) along with its inverted images (right). Scale = 10mm. **B**, representative confocal Z stack images of the biofilms of  $\Delta sarA$ , USA300 &  $\Delta rexB$  developed on polycarbonate membrane indicating the thickness of biofilm. The red arrow indicates the horizontal plane and the blue arrow indicates the vertical plane. **C**, bar diagram representing the intensity of the *in vitro* biofilms as calculated from the digital inverted photos. Data are mean $\pm$ SEM (n=4), \*p<0.05 compared to  $\Delta sarA$ . **D**, bar diagram indicates the average thickness of the biofilms developed on PCM membrane, as quantified from confocal images. \*p<0.05 compared to  $\Delta sarA$ . **E**, the representative growth curve of the wild type and the mutant strains of *S.aureus*.

**Fig S3. Hyper-biofilm infection by *S. aureus* USA:: $\Delta rexB$  in murine wounds severely compromises tensile strength of the repaired skin.** Two 8 x 16-mm full-thickness excisional wounds were made on the dorsal skin of C57BL/6 mice. Each of the two wounds was topically infected with isogenic strains of *S. aureus* USA300, USA300::*rexB* ( $\Delta rexB$ ) or USA300::*sarA* ( $\Delta sarA$ ). **A**, miR-143 expression in the healed skin measured on d5 post-wound closure (d21). **B**, Granulation tissue collagen content was determined in the repaired skin measured on d5 post-wound closure (d21) using hydroxyproline assay. **C-E**, Collagen 1 protein and mRNA expression in the repaired skin measured on d5 post-wound closure (d21). **F-G**, MMP2 expression in the repaired skin measured on d5 post-wound closure (d21). **H**, Tensile strength of the healed wounds was measured in the repaired skin measured on d5 post-wound closure (d21). Data are mean $\pm$ SEM (n=3-7), \*p<0.05 compared to  $\Delta sarA$ . Scale bar = 30 $\mu$ m.

**Figure S5.** Bar diagram represents the bacterial collagenase activity measured on day 35 from the porcine burn wounds inoculated with  $\Delta sarA$ , USA300 &  $\Delta rexB$ . Data are mean $\pm$ SEM (n=6).

**Fig S6. Hyper-biofilm infection by *S. aureus* USA: $\Delta$ *rexB* in human engineered skin compromises miR-143 expression and attenuates Collagen 1 protein.** Human engineered skin was subjected to treatment with conditioned media obtained from the 3 isogenic mutant strains of *Staphylococcus aureus*  $\Delta$ *sarA*, USA300 &  $\Delta$ *rexB* for 72h **A**, miR-143 expression in the laser-captured dermal component of the human engineered skin was measured using RT-PCR. **B**, Collagen content of the human engineered skin was determined using hydroxyproline assay. **C-D**, Collagen 1 protein expression, Data are mean $\pm$ SEM (n=3-6). \* $p$ <0.05 compared to  $\Delta$ *sarA*. Scale bar = 30 $\mu$ m. **D-E**, MMP2 protein expression. Data are mean $\pm$ SEM (n=3-6). \* $p$ <0.05 compared to  $\Delta$ *sarA*. Scale bar = 30 $\mu$ m.

## REFERENCES

1. Ganesh K, Das A, Dixith S, et al. Electric field based dressing disrupts mixed-species bacterial biofilm infection and restores functional wound healing *Annals of Surgery* 2017; in press.
2. Shapiro JP, Biswas S, Merchant AS, et al. A quantitative proteomic workflow for characterization of frozen clinical biopsies: laser capture microdissection coupled with label-free mass spectrometry. *J Proteomics* 2012; 77:433-40.
3. Ebersole GC, Anderson PM, Powell HM. Epidermal differentiation governs engineered skin biomechanics. *J Biomech* 2010; 43(16):3183-90.

**A**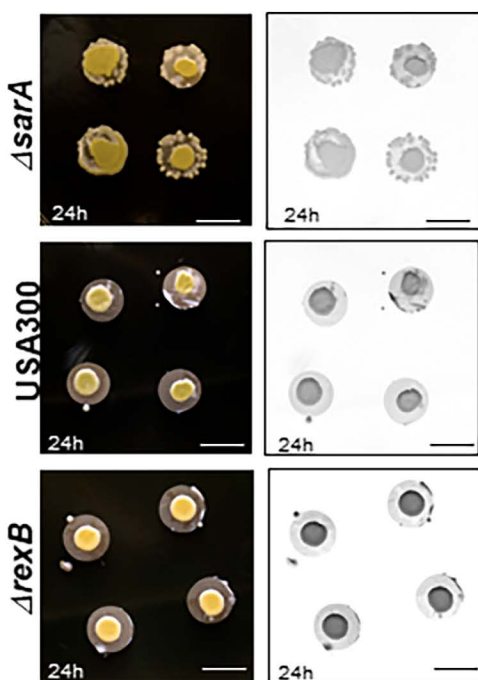**B**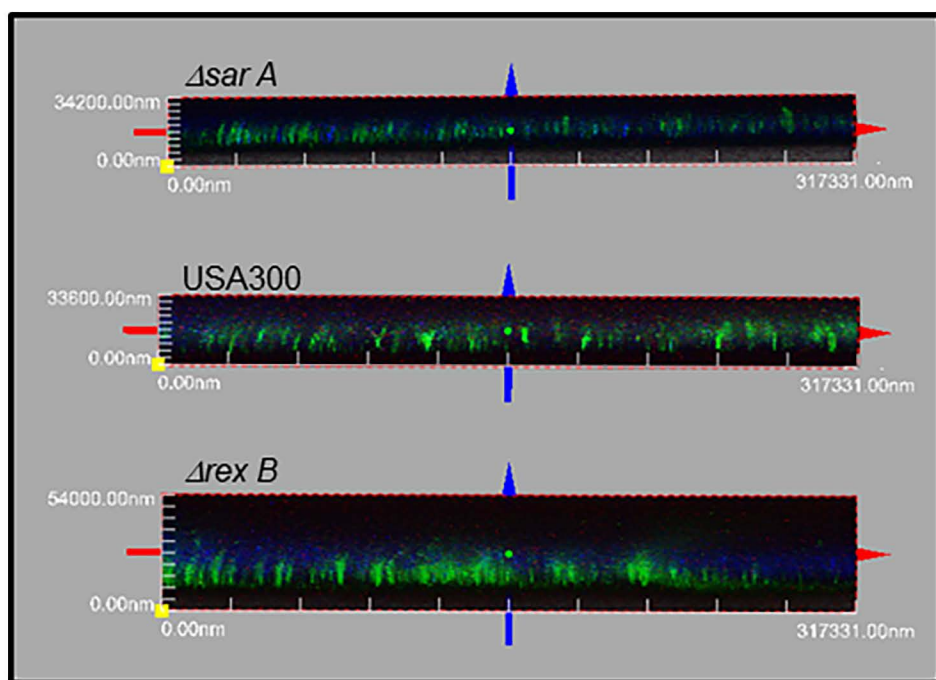**C**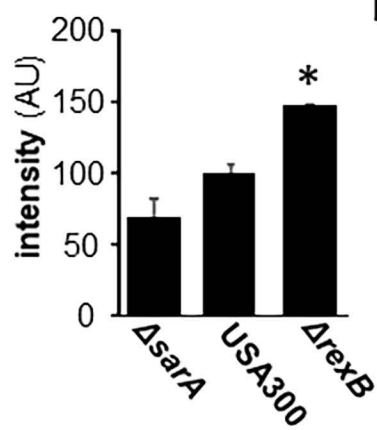**D**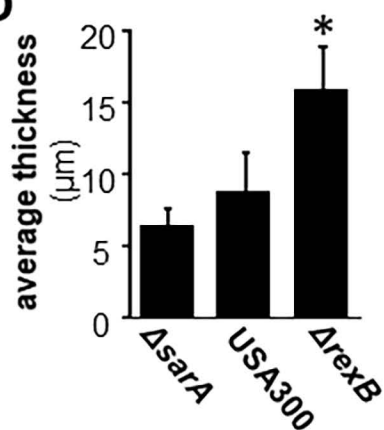**E**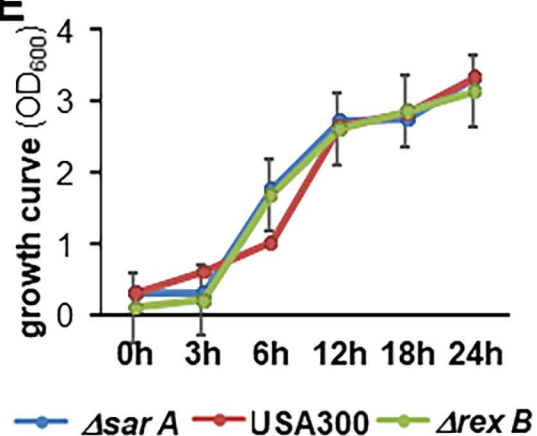

Figure S1

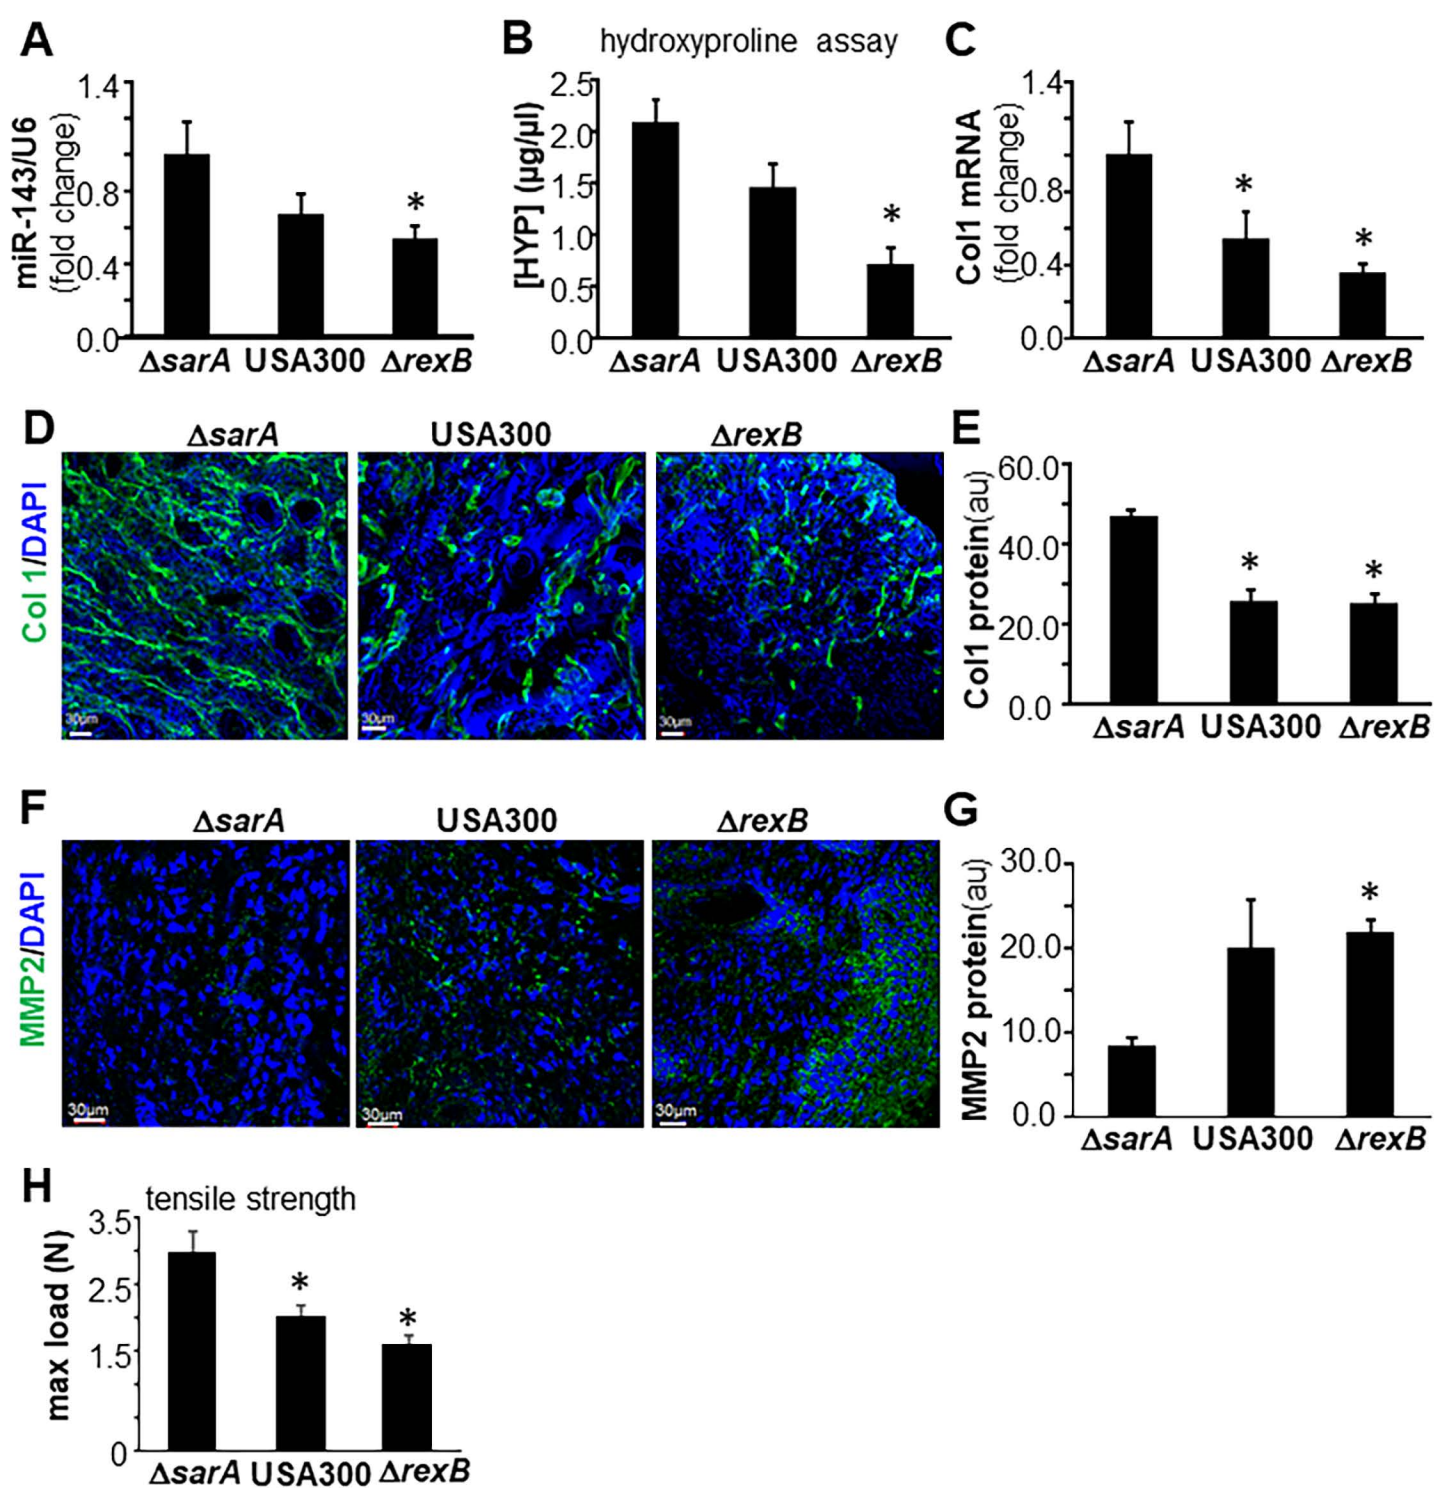

Figure S3

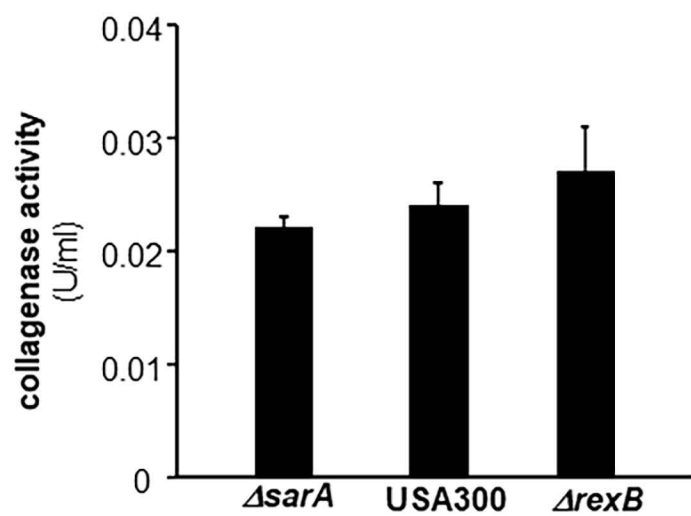

Figure S5

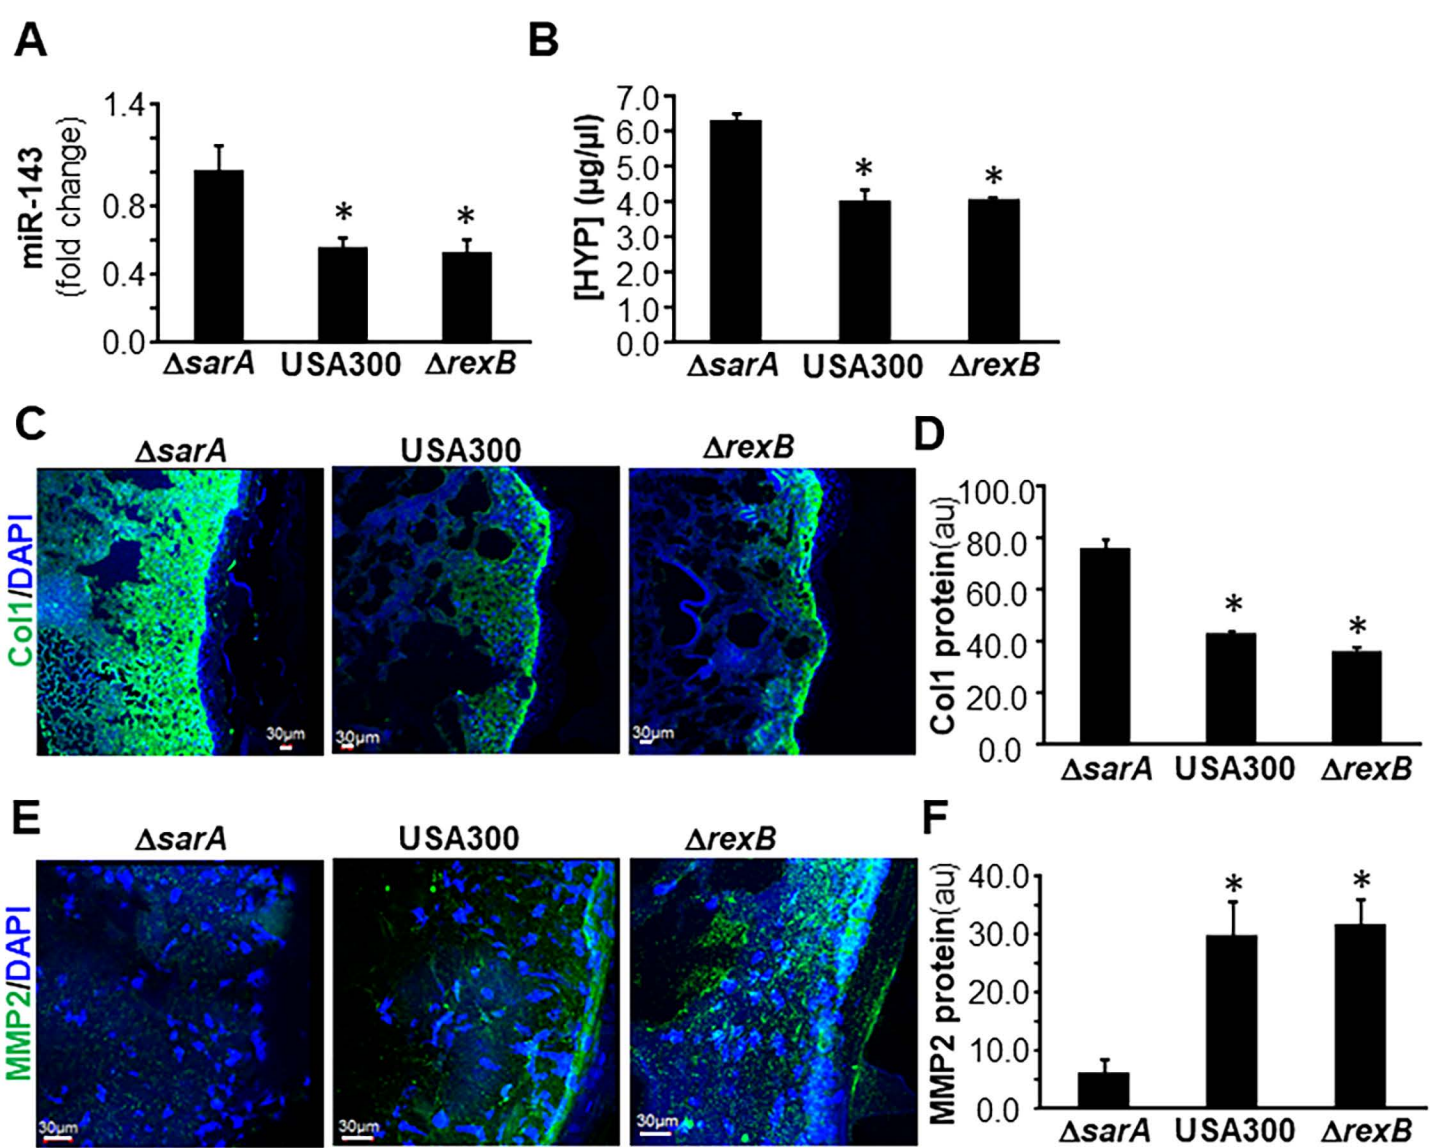

Figure S6
